# Supplementary material
Source: PubMed Central journal article supplement (PMC5654612)
Supplement: NIHMS897794-supplement-2.pdf [file NIHMS897794-supplement-2.pdf]

**TALEN Design**

| RVD position | 1  | 2  | 3  | 4  | 5  | 6  | 7  | 8  | 9  | 10 | 11 | 12 | 13 | 14 | 15 | Target site                                  |
|--------------|----|----|----|----|----|----|----|----|----|----|----|----|----|----|----|----------------------------------------------|
| tAR2 Left    | NN | NI | NI | HD | NI | NG | NG | HD | HD | NG | NN | HD | HD | NG | NN | gaacattcctgcctggctgacatgtggactctctgaaattgtat |
| tAR2 Right   | NI | NG | NI | NI | HD | NI | NI | NG | NG | NG | HD | NI | NN | NI | NN |                                              |

Table S1: Repeat variable dinucleotide (RVD) modules used to create tAR2 left and right TALENs.

| <b>Sample ID</b> | <b>Type</b> | <b>Mean Per-Base Read Coverage of AR</b> | <b>AR Copy Number</b> | <b>AR bases with zero coverage</b> | <b>AR bases with coverage</b> |
|------------------|-------------|------------------------------------------|-----------------------|------------------------------------|-------------------------------|
| 22Rv1-undup1     | met         | 347                                      | 1                     | 36377                              | 150211                        |
| 22Rv1-undup3     | met         | 325                                      | 1                     | 39932                              | 146656                        |

Table S2: Mean per-base read coverage and copy number of the AR gene for 22Rv1 sub-lines.

| Cell line    | Replicate | Chromosome | Position | Reference (calls) | Alternate (calls) | VAF      |
|--------------|-----------|------------|----------|-------------------|-------------------|----------|
| 22Rv1-undup1 | 1         | X          | 66943543 | C (19)            | T (580)           | 0.96828  |
| 22Rv1-undup1 | 2         | X          | 66943543 | C (14)            | T (557)           | 0.975482 |
| 22Rv1-undup3 | 1         | X          | 66943543 | C (8)             | T (458)           | 0.982833 |
| 22Rv1-undup3 | 2         | X          | 66943543 | C (7)             | T (433)           | 0.984091 |

Table S3: Confirmation of 22Rv1 genetic background in undup1, undup3 sub-lines. The presence of the H874Y-encoding C/T mutation in both 22Rv1-undup1 (VAF, replicate 1=96.83%,replicate 2= 97.55%) and 22Rv1-undup3 (VAF, replicate 1=98.29%, replicate 2= 98.41%) was confirmed using Freebayes and Varscan mutation callers.
